# Supplementary material for: Feasibility of the TBDx automated digital microscopy system for the diagnosis of pulmonary tuberculosis
Source: PLoS One. 2017 Mar 2;12(3):e0173092. doi: 10.1371/journal.pone.0173092 (PMC5333855; doi:10.1371/journal.pone.0173092)
Supplement: S1 Dataset — (XLSX) [file pone.0173092.s003.xlsx]

## Sheet: Sheet1
Experience microscopy	First use TBDx platform	TBDx user manual	Training for microscopist	Contrast, color, background	Set Z range	Ease info entry	Use compared to LED	Hands on time compared to LED	Hands on time for neg	TBDx alternative to LED	Main barrier(s)
1 – 3 years	Easy, but a user manual with instructions is required	Easy to read and understand; covers all questions I had during installation/use/troubleshooting	2-3 days	Very satisfied	Difficult, but only a matter of training	Yes, always	Same	More time	More time	Yes	Number of steps
1 – 3 years	Rather difficult; some problems were faced during installation/first use	Easy to read and understand; covers all questions I had during installation/use/troubleshooting	2-3 days	Very satisfied	Difficult, but only a matter of training	Yes, always	Same	More time	More time	Yes	Number of steps
more than 10 years	Rather difficult; some problems were faced during installation/first use	Easy to read and understand; covers all questions I had during installation/use/troubleshooting	more than 4 days	Very satisfied	Difficult, but only a matter of training	Yes, always	More difficult	More time	More time	No	Number of steps, Microscope-specific
more than 10 years	Easy, but a user manual with instructions is required	Easy to read and understand; covers all questions I had during installation/use/troubleshooting	2-3 days	Satisfied	Easy, I quickly got used to it	Yes, always	More difficult	More time	More time	Yes	Total time
5 – 10 years	Easy, but a user manual with instructions is required	Easy to read and understand; covers all questions I had during installation/use/troubleshooting	1 day	Satisfied	Easy, I quickly got used to it	Yes, most of the times	More difficult	More time	More time	Don't know	Total time, Low specificity, Microscope-sepcific
more than 10 years	Rather difficult; some problems were faced during installation/first use	Easy to read and understand; covers all questions I had during installation/use/troubleshooting	1 day	Satisfied	Difficult, but only a matter of training	Don’t know	More difficult	More time	Same	No	Low specificity, Microscope-sepcific
